# Supplementary material
Source: PubMed Central journal article supplement (PMC3992651)
Supplement: 1322085111_pnas.201322085SI.pdf [file 1322085111_pnas.201322085SI.pdf]

# Supporting Information

Fuchs et al. 10.1073/pnas.1322085111

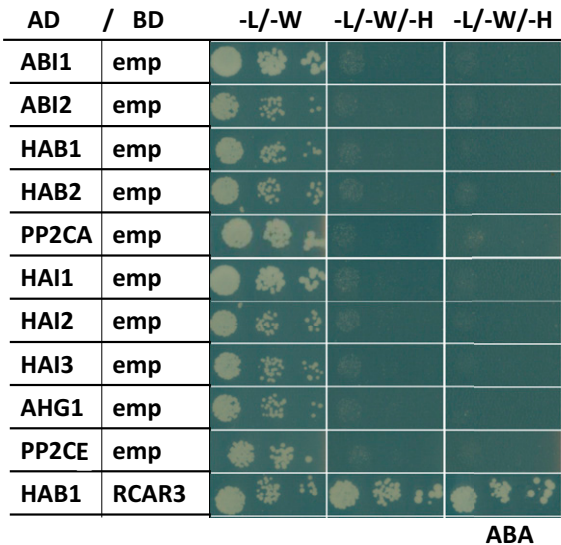

**Fig. S1.** Regulatory component of abscisic acid (ABA) receptor (RCAR) interaction with protein phosphatases 2C (PP2Cs). Controls of yeast two-hybrid analysis of RCAR7 interaction with all nine clade A PP2Cs. The analysis of histidine-autotrophic growth (-H) is presented for yeasts expressing PP2Cs in the activation domain (AD) and containing the empty DNA-binding cassette (BD, emp) in the absence and presence of 30  $\mu$ M ABA. PP2CE-emp and HAB1-RCAR3 served as negative and positive controls, respectively.

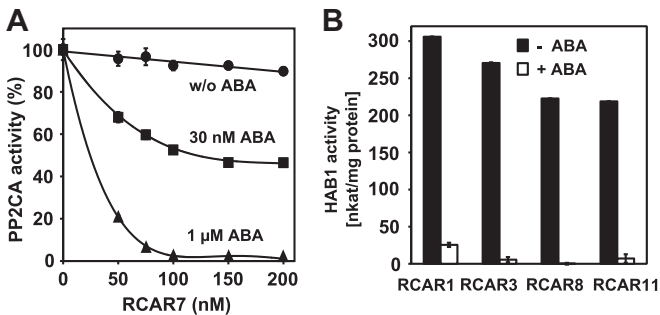

**Fig. S2.** Regulation of HAB1 phosphatase activity by RCARs. (A) RCAR7-mediated inhibition of PP2CA (50 nM). The activity of PP2CA in the absence of ABA and RCAR7 was set to 100% (0.45  $\mu$ kat/mg protein). (B) RCAR1-, RCAR3-, RCAR8-, and RCAR11-mediated inhibition of HAB1 phosphatase activity in the presence and absence of 1  $\mu$ M ABA. HAB1 protein (50 nM) was incubated in the presence of a twofold molar excess of RCAR (mean  $\pm$  SD).
